# Supplementary material for: Whole genomic analysis reveals atypical non-homologous off-target large structural variants induced by CRISPR-Cas9-mediated genome editing
Source: PubMed Central journal article supplement (PMC10457329; doi:10.1038/s41467-023-40901-x), 2023-08-25
Supplement: 41467_2023_40901_MOESM1_ESM.pdf [file 41467_2023_40901_MOESM1_ESM.pdf]

Whole genomic analysis reveals atypical non-homologous off-target large structural variants induced by CRISPR-Cas9-mediated genome editing

**Supplementary information**

### Supplementary Table 1.

Sequencing data statistics of parental and edited genomes.

| Lines                              | DNA in molecule >20 Kb | Mean depth | Mapping rate | % SNPs phased | Number of reads |
|------------------------------------|------------------------|------------|--------------|---------------|-----------------|
| NC01                               | 90.8%                  | 56.2x      | 95.5%        | 99.2%         | 1,318,618,290   |
| NC01- <i>B2M</i> <sup>-/-</sup> -1 | 93.9%                  | 53.4x      | 95.4%        | 99.1%         | 1,255,152,084   |
| NC01- <i>B2M</i> <sup>-/-</sup> -2 | 95.3%                  | 48.5x      | 95.5%        | 99.1%         | 1,137,678,996   |
| NC01- <i>B2M</i> <sup>-/-</sup> -3 | 90.3%                  | 53.1x      | 95.3%        | 99.1%         | 1,252,163,658   |

Average mean depth: 52.8x; Average mapping rate: 95.4%; Average % SNPs phased: 99.1%

### Supplementary Table 1. Sequencing data statistics of parental and edited genomes.

The HMW gDNAs of parental and edited clones were extracted and subjected to 10x Genomics Linked-Reads Chromium whole genome sequencing and aligned with GRCh38.

**Supplementary Table 2.**

List of potential off-target sites predicted by Cas-OFFinder with mismatch numbers equal to or less than 6 and DNA bulge size equal to or less than 2, which are close to the large SV1 (chr3:41537429-41673419) detected in the *B2M* knockout clone\*.

| Chromosome | Genome localization | Strand | Mismatches | Bulge Size |
|------------|---------------------|--------|------------|------------|
| chr3       | 40913774            | +      | 5          | 0          |
| chr3       | 45606634            | -      | 5          | 0          |

\*These predicted target sites are too far ( 0.6- and 3.9 Mb, respectively) away from the large SV to account for Cas9 cleavage.

**Supplementary Table 3.**

List of potential off-target sites predicted by CRISTA, which are close to the large SV (chr3:41537429-41673419) detected in the *B2M* knockout clone\*.

| chromosome | strand | start position | pairwise alignment score | total_bulges | #mismatches | CRISTA score |
|------------|--------|----------------|--------------------------|--------------|-------------|--------------|
| chr3       | +      | 40010226       | 13.5                     | 2            | 2           | 0.145146828  |
| chr3       | +      | 46541862       | 12.5                     | 2            | 3           | 0.174546442  |

\*These predicted target sites are too far ( 0.6- and 4.7Mb, respectively) away from the large SV to account for Cas9 cleavage.

### Supplementary Table 4.

List of potential off-target sites predicted by Elevation, which are close to the large SV (chr3:41537429-41673419) detected in the *B2M* knockout clone\*.

Machine learning-based end-to-end CRISPR/Cas9 guide design

Please cite papers according to these instructions

( On-Target + Off-Target )    ( On-Target Only )

Input Gene / Transcript ID    Input Sequence

ENSG00000166710

Model  
 In Vitro  
 In Vivo

Search    Demo

Unable to retrieve data.

\* Elevation software was interrogated for *B2M* gene (ENSG00000166710), it showed “unable to retrieve data”.

### Supplementary Table 5.

Sequencing data statistics of parental and edited genomes.

| Lines                             | DNA in molecule >20 Kb | DNA in molecule >100 Kb | Mean depth | Mapping rate | % SNPs phased | Number of reads |
|-----------------------------------|------------------------|-------------------------|------------|--------------|---------------|-----------------|
| iPSC-71                           | 95.5%                  | 20.4%                   | 57.4x      | 97.7%        | 99%           | 1,294,721,622   |
| iPSC-71- <i>APP<sup>C/G</sup></i> | 97.3%                  | 70.5%                   | 56.3x      | 97%          | 99%           | 1,277,632,416   |
| iPSC-71- <i>APP<sup>C/C</sup></i> | 97%                    | 71.7%                   | 60.4x      | 96.9%        | 99%           | 1,372,945,614   |

Average mean depth: 58x; Average mapping rate: 97.2%; Average % SNPs phased: 99%

### Supplementary Table 5. Sequencing data statistics of parental and edited genomes.

The HMW gDNAs of parental and edited clones were extracted and subjected to 10x Genomics Linked-Reads Chromium whole genome sequencing and aligned with GRCh38.

**Supplementary Table 6.**

List of potential off-target sites predicted by Cas-OFFinder with mismatch numbers equal to or less than 6 and DNA bulge size equal to or less than 2, which are close to the region of large SV (chr3:39882164-39973392) detected in the *APP<sup>C/C</sup>* clone\*.

| Chromosome | Genome localization | Strand | Mismatches | Bulge Size |
|------------|---------------------|--------|------------|------------|
| chr3       | 39771442            | +      | 3          | 0          |
| chr3       | 39468214            | -      | 4          | 0          |
| chr3       | 40570665            | -      | 4          | 0          |

\*These predicted target sites are too far ( 0.1-, 0.4-, and 0.59 Mb, respectively) away from the large SV to account for Cas9 cleavage.

### Supplementary Table 7.

List of potential off-target sites predicted by CRISTA, which are close to the large SV (chr3:39882164-39973392) detected in the *APP<sup>C/C</sup>* clone\*.

| chromosome | strand | start position | pairwise alignment score | total_bulges | #mismatches | CRISTA score |
|------------|--------|----------------|--------------------------|--------------|-------------|--------------|
| chr3       | +      | 39416247       | 12.25                    | 3            | 1           | 0.223678018  |
| chr3       | -      | 39468215       | 16                       | 0            | 4           | 0.266102458  |
| chr3       | +      | 39771442       | 14.75                    | 1            | 3           | 0.098162792  |
| chr3       | -      | 40570666       | 14.75                    | 1            | 3           | 0.083083998  |

\*These predicted target sites are too far ( 0.46-, 0.4-, 0.1- and 0.59 Mb, respectively) away from the large SV to account for Cas9 cleavage.



**Supplementary Table 8.**

List of potential off-target sites predicted by Elevation, which are close to the large SV (chr3:39882164-39973392) detected in the *APP<sup>C/C</sup>* clone\*.

| Chromosome | Position | Offtarget               | Gene   | Guide-Off-Target Score |
|------------|----------|-------------------------|--------|------------------------|
| chr3       | 39771441 | AGAAAATTCTGCCATGACTCAGG | NoGene | 0.8604388              |
| chr3       | 40570666 | ACCAAATCCAACCTGACTCTGG  | ZNF621 | 0.9256123              |

\*These predicted target sites are too far (0.1- and 0.59 Mb, respectively) from the large SV to account for Cas9 cleavage.

**Supplementary Table 9.**

Sequencing data statistics of parental and edited genomes.

| Lines                                | DNA in molecule >20 Kb | DNA in molecule >100 Kb | Mean depth | Mapping rate | % SNPs phased | Number of reads |
|--------------------------------------|------------------------|-------------------------|------------|--------------|---------------|-----------------|
| H9                                   | 96.9%                  | 67.2%                   | 55.1x      | 96.4%        | 99.5%         | 1,256,467,662   |
| H9- <i>B3GALT5</i> <sup>-/-</sup> -1 | 96.2%                  | 62.9%                   | 45.2x      | 95.6%        | 99.4%         | 1,046,826,634   |
| H9- <i>B3GALT5</i> <sup>+/-</sup> -1 | 96.2%                  | 67.7%                   | 55.7x      | 95.3%        | 99.4%         | 1,294,977,400   |
| H9- <i>B3GALT5</i> <sup>-/-</sup> -2 | 97.3%                  | 68.1%                   | 51.2x      | 97.7%        | 99.3%         | 1,177,286,556   |
| H9- <i>B3GALT5</i> <sup>-/-</sup> -3 | 97.3%                  | 70.6%                   | 50.7x      | 96.3%        | 99.3%         | 1,171,568,656   |
| ND40019*C                            | 89.5%                  | 38.4%                   | 47.1x      | 94.9%        | 98.6%         | 1,116,487,912   |
| <i>LRRK2</i><br>(G2019S)-7           | 85.2%                  | 14%                     | 49.9x      | 95.4%        | 98.7%         | 1,181,333,672   |
| <i>LRRK2</i><br>(G2019S)-35          | 86%                    | 20.9%                   | 48.4x      | 96.3%        | 98.8%         | 1,120,213,700   |
| iPSC-71- <i>DSG2</i> -1              | 96.2%                  | 62.8%                   | 58.3x      | 94.9%        | 99.4%         | 1,380,065,018   |
| iPSC-71- <i>DSG2</i> -2              | 95.6%                  | 61.2%                   | 59.0x      | 94.3%        | 99.4%         | 1,412,439,810   |

**Supplementary Table 10.**

List of potential off-target sites predicted by CasOFFinder, which are too far away from the chr2p16-22 translocation (chr2:36300001-60548383) to account for Cas9-DNA cleavage.

| sgRNA                              | Chromosome | Position | Direction | Mismatches | Bulge Size |
|------------------------------------|------------|----------|-----------|------------|------------|
| CACACAGATCTACAAGGCC (B0702-ex2g1)  | chr2       | 35257066 | -         | 2          | 1          |
| CACACAGATCTACAAGGCC (B0702-ex2g1)  | chr2       | 35257066 | -         | 3          | 1          |
| CACACAGATCTACAAGGCC (B0702-ex2g1)  | chr2       | 38837708 | -         | 3          | 1          |
| CACACAGATCTACAAGGCC (B0702-ex2g1)  | chr2       | 38837708 | -         | 3          | 1          |
| CACACAGATCTACAAGGCC (B0702-ex2g1)  | chr2       | 42282945 | -         | 3          | 1          |
| CACACAGATCTACAAGGCC (B0702-ex2g1)  | chr2       | 43066460 | +         | 3          | 1          |
| CACACAGATCTACAAGGCC (B0702-ex2g1)  | chr2       | 43066460 | +         | 3          | 1          |
| CACACAGATCTACAAGGCC (B0702-ex2g1)  | chr2       | 44948237 | -         | 3          | 2          |
| CACACAGATCTACAAGGCC (B0702-ex2g1)  | chr2       | 45150133 | +         | 3          | 1          |
| CACACAGATCTACAAGGCC (B0702-ex2g1)  | chr2       | 45793602 | -         | 4          | 0          |
| CACACAGATCTACAAGGCC (B0702-ex2g1)  | chr2       | 47537943 | +         | 3          | 1          |
| CACACAGATCTACAAGGCC (B0702-ex2g1)  | chr2       | 47551897 | -         | 3          | 1          |
| CACACAGATCTACAAGGCC (B0702-ex2g1)  | chr2       | 51092483 | -         | 3          | 1          |
| CACACAGATCTACAAGGCC (B0702-ex2g1)  | chr2       | 51616623 | +         | 3          | 1          |
| CACACAGATCTACAAGGCC (B0702-ex2g1)  | chr2       | 51616623 | +         | 3          | 1          |
| CACACAGATCTACAAGGCC (B0702-ex2g1)  | chr2       | 54601355 | -         | 3          | 1          |
| CACACAGATCTACAAGGCC (B0702-ex2g1)  | chr2       | 56038698 | -         | 4          | 0          |
| CACACAGATCTACAAGGCC (B0702-ex2g1)  | chr2       | 56038698 | -         | 3          | 1          |
| CACACAGATCTACAAGGCC (B0702-ex2g1)  | chr2       | 56038698 | -         | 3          | 1          |
| CACACAGATCTACAAGGCC (B0702-ex2g1)  | chr2       | 56038698 | -         | 2          | 2          |
| CACACAGATCTACAAGGCC (B0702-ex2g1)  | chr2       | 56038698 | -         | 2          | 2          |
| CACACAGATCTACAAGGCC (B0702-ex2g1)  | chr2       | 56038698 | -         | 2          | 2          |
| CACACAGATCTACAAGGCC (B0702-ex2g1)  | chr2       | 56038698 | -         | 2          | 2          |
| CACACAGATCTACAAGGCC (B0702-ex2g1)  | chr2       | 57900070 | +         | 3          | 1          |
| CACACAGATCTACAAGGCC (B0702-ex2g1)  | chr2       | 57900070 | +         | 3          | 1          |
| CACACAGATCTACAAGGCC (B0702-ex2g1)  | chr2       | 57900070 | +         | 3          | 1          |
| CACACAGATCTACAAGGCC (B0702-ex2g1)  | chr2       | 57925211 | -         | 2          | 2          |
| CACACAGATCTACAAGGCC (B0702-ex2g1)  | chr2       | 60634249 | +         | 3          | 2          |
| GATCTGAGCCGCGGTGTCCG (C0702-ex3g3) | chr2       | 33976808 | +         | 4          | 1          |
| GATCTGAGCCGCGGTGTCCG (C0702-ex3g3) | chr2       | 33976808 | +         | 4          | 1          |
| GATCTGAGCCGCGGTGTCCG (C0702-ex3g3) | chr2       | 35112139 | +         | 5          | 0          |
| GATCTGAGCCGCGGTGTCCG (C0702-ex3g3) | chr2       | 37272893 | +         | 5          | 0          |
| GATCTGAGCCGCGGTGTCCG (C0702-ex3g3) | chr2       | 37978073 | -         | 4          | 2          |
| GATCTGAGCCGCGGTGTCCG (C0702-ex3g3) | chr2       | 39628942 | -         | 4          | 2          |
| GATCTGAGCCGCGGTGTCCG (C0702-ex3g3) | chr2       | 42359127 | -         | 3          | 2          |
| GATCTGAGCCGCGGTGTCCG (C0702-ex3g3) | chr2       | 42394303 | -         | 4          | 2          |
| GATCTGAGCCGCGGTGTCCG (C0702-ex3g3) | chr2       | 42394303 | -         | 3          | 2          |
| GATCTGAGCCGCGGTGTCCG (C0702-ex3g3) | chr2       | 42622157 | -         | 4          | 2          |
| GATCTGAGCCGCGGTGTCCG (C0702-ex3g3) | chr2       | 42896089 | +         | 4          | 2          |
| GATCTGAGCCGCGGTGTCCG (C0702-ex3g3) | chr2       | 43063760 | -         | 4          | 2          |
| GATCTGAGCCGCGGTGTCCG (C0702-ex3g3) | chr2       | 43678462 | -         | 4          | 2          |
| GATCTGAGCCGCGGTGTCCG (C0702-ex3g3) | chr2       | 43678462 | -         | 4          | 2          |
| GATCTGAGCCGCGGTGTCCG (C0702-ex3g3) | chr2       | 44068086 | -         | 4          | 2          |
| GATCTGAGCCGCGGTGTCCG (C0702-ex3g3) | chr2       | 45030064 | -         | 5          | 0          |
| GATCTGAGCCGCGGTGTCCG (C0702-ex3g3) | chr2       | 45030064 | -         | 3          | 1          |
| GATCTGAGCCGCGGTGTCCG (C0702-ex3g3) | chr2       | 45713251 | -         | 3          | 2          |
| GATCTGAGCCGCGGTGTCCG (C0702-ex3g3) | chr2       | 46792947 | -         | 3          | 2          |
| GATCTGAGCCGCGGTGTCCG (C0702-ex3g3) | chr2       | 46792947 | -         | 3          | 2          |
| GATCTGAGCCGCGGTGTCCG (C0702-ex3g3) | chr2       | 46912055 | -         | 3          | 2          |
| GATCTGAGCCGCGGTGTCCG (C0702-ex3g3) | chr2       | 49742943 | +         | 5          | 0          |
| GATCTGAGCCGCGGTGTCCG (C0702-ex3g3) | chr2       | 54368735 | -         | 5          | 0          |
| GATCTGAGCCGCGGTGTCCG (C0702-ex3g3) | chr2       | 54485430 | +         | 4          | 2          |
| GATCTGAGCCGCGGTGTCCG (C0702-ex3g3) | chr2       | 56106176 | +         | 5          | 0          |
| GATCTGAGCCGCGGTGTCCG (C0702-ex3g3) | chr2       | 56106176 | +         | 3          | 2          |
| GATCTGAGCCGCGGTGTCCG (C0702-ex3g3) | chr2       | 56556885 | +         | 5          | 0          |
| GATCTGAGCCGCGGTGTCCG (C0702-ex3g3) | chr2       | 56556887 | +         | 3          | 2          |
| GATCTGAGCCGCGGTGTCCG (C0702-ex3g3) | chr2       | 60149897 | -         | 5          | 0          |
| GATCTGAGCCGCGGTGTCCG (C0702-ex3g3) | chr2       | 60334152 | -         | 4          | 1          |
| GATCTGAGCCGCGGTGTCCG (C0702-ex3g3) | chr2       | 60385253 | +         | 5          | 0          |
| GATCTGAGCCGCGGTGTCCG (C0702-ex3g3) | chr2       | 61258977 | -         | 5          | 0          |

### Supplementary Table 11.

List of potential off-target sites predicted by CRISTA, which are too far away from the chr2p16-22 translocation (chr2:36300001-60548383) to account for Cas9-DNA cleavage.

| sgRNA                              | chromosome | strand | start position | pairwise alignment score | total bulges | #RNA bulges | #DNA bulges | #mismatches | CRISTA score |
|------------------------------------|------------|--------|----------------|--------------------------|--------------|-------------|-------------|-------------|--------------|
| CACACAGATCTACAAGGCC (B0702-ex2g1)  | chr2       | -      | 38837709       | 14.75                    | 1            | 1           | 0           | 3           | 0.129116     |
| CACACAGATCTACAAGGCC (B0702-ex2g1)  | chr2       | -      | 42282946       | 14.75                    | 1            | 1           | 0           | 3           | 0.110502     |
| CACACAGATCTACAAGGCC (B0702-ex2g1)  | chr2       | +      | 43066461       | 14.75                    | 1            | 1           | 0           | 3           | 0.087689     |
| CACACAGATCTACAAGGCC (B0702-ex2g1)  | chr2       | +      | 45150134       | 14.75                    | 1            | 1           | 0           | 3           | 0.098652     |
| CACACAGATCTACAAGGCC (B0702-ex2g1)  | chr2       | +      | 45611338       | 12.5                     | 2            | 2           | 0           | 3           | 0.130078     |
| CACACAGATCTACAAGGCC (B0702-ex2g1)  | chr2       | +      | 47537944       | 14.75                    | 1            | 1           | 0           | 3           | 0.086638     |
| CACACAGATCTACAAGGCC (B0702-ex2g1)  | chr2       | -      | 47551898       | 15.75                    | 1            | 0           | 1           | 3           | 0.169851     |
| CACACAGATCTACAAGGCC (B0702-ex2g1)  | chr2       | -      | 56038699       | 16                       | 0            | 0           | 0           | 4           | 0.33646      |
| CACACAGATCTACAAGGCC (B0702-ex2g1)  | chr2       | +      | 57900071       | 17                       | 0            | 0           | 0           | 3           | 0.365095     |
| CACACAGATCTACAAGGCC (B0702-ex2g1)  | chr2       | -      | 57925212       | 13.5                     | 2            | 2           | 0           | 2           | 0.158089     |
| GATCTGAGCCGCGGTGTCCG (C0702-ex3g3) | chr2       | -      | 42359128       | 13.5                     | 2            | 2           | 0           | 2           | 0.142309     |
| GATCTGAGCCGCGGTGTCCG (C0702-ex3g3) | chr2       | -      | 44931692       | 11.25                    | 3            | 3           | 0           | 2           | 0.172224     |
| GATCTGAGCCGCGGTGTCCG (C0702-ex3g3) | chr2       | -      | 45116717       | 11.25                    | 3            | 3           | 0           | 2           | 0.144644     |
| GATCTGAGCCGCGGTGTCCG (C0702-ex3g3) | chr2       | -      | 54626146       | 13.5                     | 2            | 1           | 1           | 3           | 0.098709     |
| GATCTGAGCCGCGGTGTCCG (C0702-ex3g3) | chr2       | +      | 55269338       | 13.5                     | 2            | 2           | 0           | 2           | 0.166769     |

**Supplementary Table 12.**

Primers used in this study.

| Primers                                                 | sequences                         |
|---------------------------------------------------------|-----------------------------------|
| Primer <b>a</b> for large SV1 (chr3:41535938-61680677)  | GGT GTG GTG TCT ATT AGC TCC       |
| Primer <b>b</b> for large SV1 (chr3:41535938-61680677)  | GGC AGG AAG GGA TAG GCT AAC       |
| Primer <b>c</b> for large SV1 (chr3:41535938-61680677)  | GAG ACT TGT TAC ATA AGG TGA GGA C |
| Primer <b>a</b> for large SV2 (chr15:44580927–44980927) | CTT CCA AGA TCT CTG CCC CTC       |
| Primer <b>b</b> for large SV2 (chr15:44580927–44980927) | GCA GGG TTT CTC CAT TCT CTG G     |
| Primer <b>c</b> for large SV2 (chr15:44580927–44980927) | GTG AAT GAG CCA TGG GCA CTG G     |
| Primer <b>a</b> for large SV (chr3:39882164-39973392)   | ATA CCA AGT CAG TTT TCC TTC C     |
| Primer <b>b</b> for large SV (chr3:39882164-39973392)   | ATC AGT CAG CCA GAA ATG ATG C     |
| Primer <b>c</b> for large SV (chr3:39882164-39973392)   | TAA TTG TGA TGT TAG GGT GTC C     |
| sgRNA for <i>B2M</i> knockout                           | CGCGAGCACAGCTAAGGCCA              |
| sgRNA for <i>APP</i> knock in                           | AGAATTCCGACATGACTC                |
| sgRNA for <i>B3GALT5</i> knockout                       | GTATATTTGCCTTCTGGTTC              |

## Supplementary Fig. 1

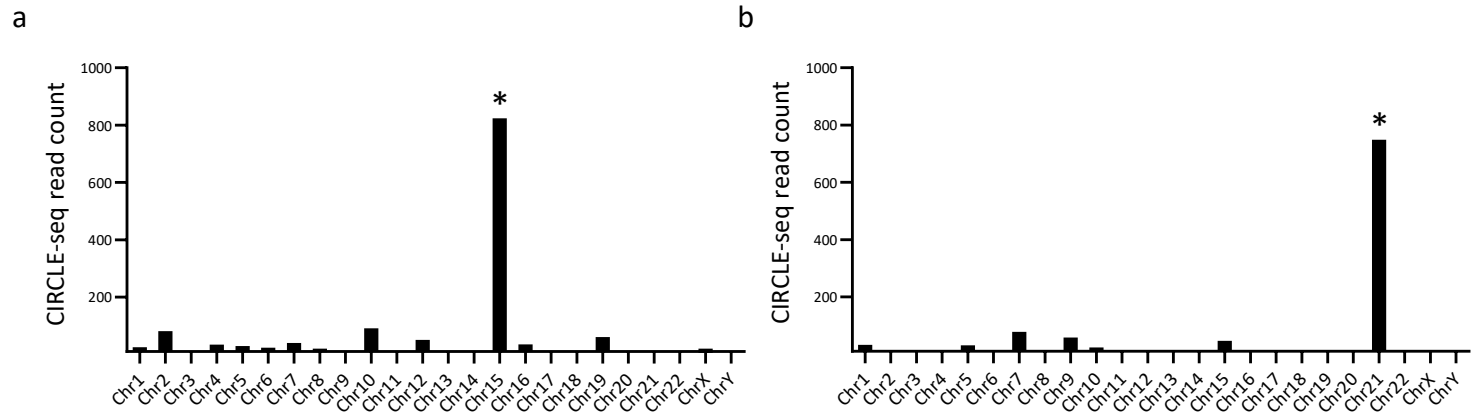

**Supplementary Fig. 1. CIRCLE-seq detected off-target cleavage sites.** (a) Histogram of CIRCLE-seq detected off-target sites of sgRNA (target to *B2M* gene) organized by chromosome, with bar heights representing CIRCLE-seq read counts. (b) Histogram of CIRCLE-seq detected off-target sites of sgRNA (target to *APP* gene). The asterisk \* denotes the target site.

## Supplementary Fig. 2

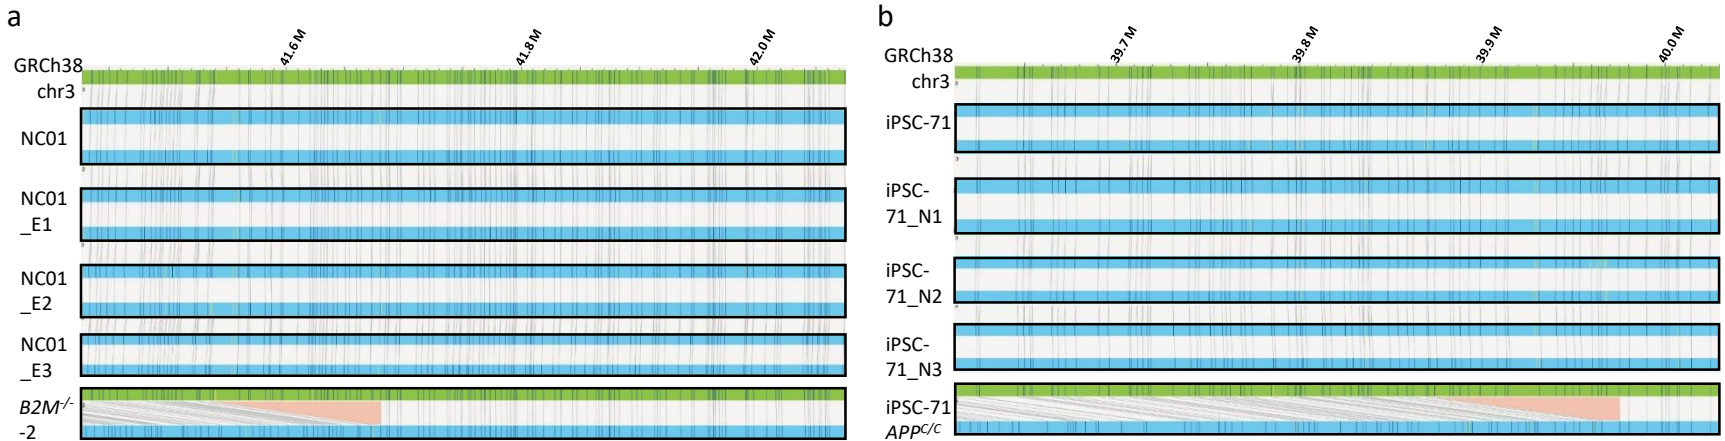

**Supplementary Fig. 2. Detecting large structural variants that may be captured by optical genome mapping on a subject genome (blue) aligned to a reference genome (green).** (a) Optical genome mapping data of parental (NC01), PiggyBac-mediated *ETV2i2* knock-in (NC01\_E1, E2, and E3), and *B2M*<sup>-/-</sup>-2 at the chr3: 41,427,045-42,075,423. (b) Optical genome mapping data of parental (iPSC-71), PiggyBac-mediated *NGN2* knock-in (iPSC-71\_N1, N2, and N3), and *APPC*<sup>C/C</sup> at the chr3: 39,611,790-40,030,052.

## Supplementary Fig. 3

a

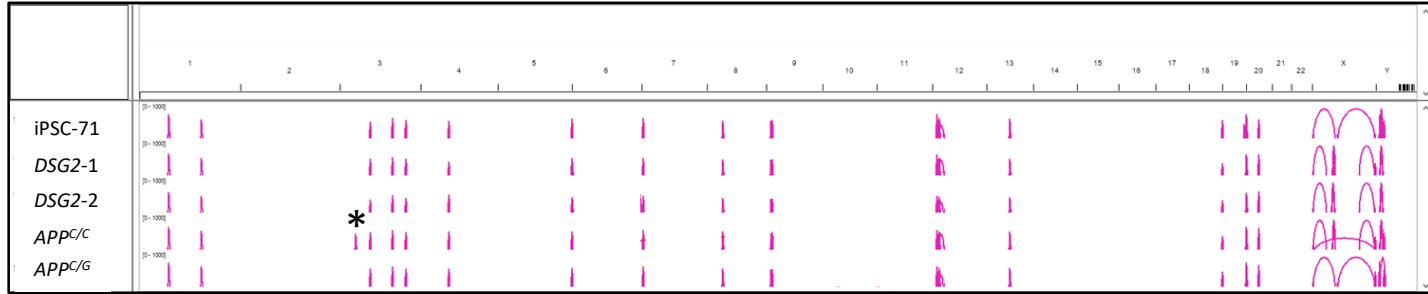

b

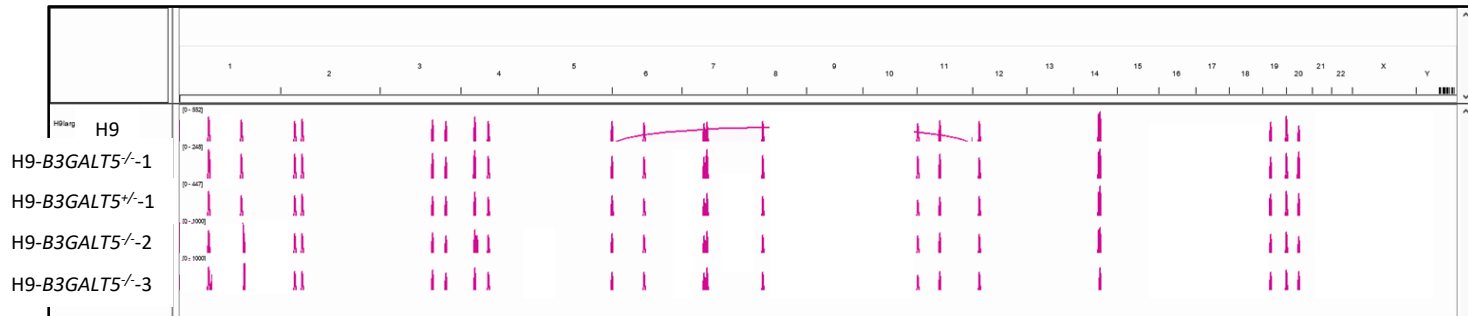

c

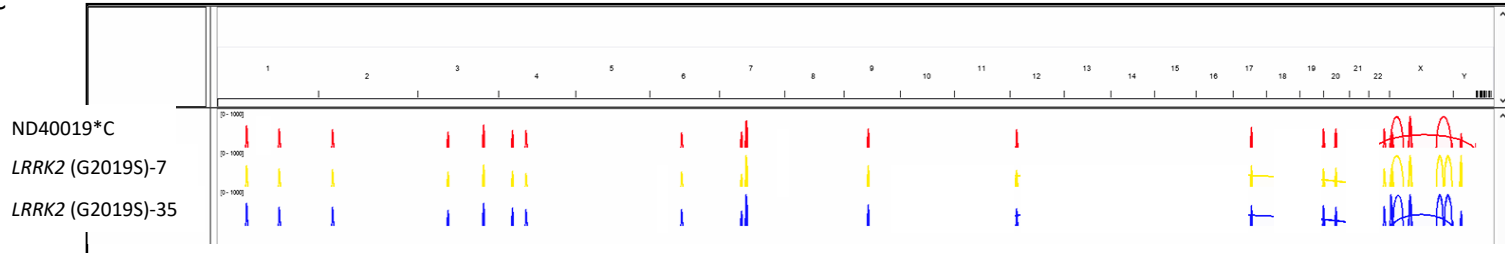

**Supplementary Fig. 3. Large SV calls are constructed from linked-reads.** (a) The large SV calls are constructed from linked reads of the parental iPSC-71 and the two single-cell clones of the *DSG2* (F531C) knock-in clones. (b) The large SV calls are constructed from linked-reads of the parental (H9) and the four single-cell clones of *B3GALT5* knockouts. (c) The large SV calls are constructed from linked-reads of the parental iPSC (ND40019\*C) and the two single-cell clones of the *LRRK2* (G2019S) knock-in. Peaks represent the predicted large SV calls compared to GRCh38. There is no difference detected between parental and mutants. The asterisks \* indicated large SVs on chromosomes 3 in *APPC/C*.
