# Supplementary material for: Whole genomic analysis reveals atypical non-homologous off-target large structural variants induced by CRISPR-Cas9-mediated genome editing
Source: PubMed Central journal article supplement (PMC10457329; doi:10.1038/s41467-023-40901-x), 2023-08-25
Supplement: 41467_2023_40901_MOESM2_ESM.pdf [file 41467_2023_40901_MOESM2_ESM.pdf]

## Reporting Summary

Nature Portfolio wishes to improve the reproducibility of the work that we publish. This form provides structure for consistency and transparency in reporting. For further information on Nature Portfolio policies, see our [Editorial Policies](#) and the [Editorial Policy Checklist](#).

### Statistics

For all statistical analyses, confirm that the following items are present in the figure legend, table legend, main text, or Methods section.

n/a Confirmed

- The exact sample size ( $n$ ) for each experimental group/condition, given as a discrete number and unit of measurement
- A statement on whether measurements were taken from distinct samples or whether the same sample was measured repeatedly
- The statistical test(s) used AND whether they are one- or two-sided  
*Only common tests should be described solely by name; describe more complex techniques in the Methods section.*
- A description of all covariates tested
- A description of any assumptions or corrections, such as tests of normality and adjustment for multiple comparisons
- A full description of the statistical parameters including central tendency (e.g. means) or other basic estimates (e.g. regression coefficient) AND variation (e.g. standard deviation) or associated estimates of uncertainty (e.g. confidence intervals)
- For null hypothesis testing, the test statistic (e.g.  $F$ ,  $t$ ,  $r$ ) with confidence intervals, effect sizes, degrees of freedom and  $P$  value noted  
*Give  $P$  values as exact values whenever suitable.*
- For Bayesian analysis, information on the choice of priors and Markov chain Monte Carlo settings
- For hierarchical and complex designs, identification of the appropriate level for tests and full reporting of outcomes
- Estimates of effect sizes (e.g. Cohen's  $d$ , Pearson's  $r$ ), indicating how they were calculated

*Our web collection on [statistics for biologists](#) contains articles on many of the points above.*

### Software and code

Policy information about [availability of computer code](#)

Data collection

Data analysis

For manuscripts utilizing custom algorithms or software that are central to the research but not yet described in published literature, software must be made available to editors and reviewers. We strongly encourage code deposition in a community repository (e.g. GitHub). See the Nature Portfolio [guidelines for submitting code & software](#) for further information.

### Data

Policy information about [availability of data](#)

All manuscripts must include a [data availability statement](#). This statement should provide the following information, where applicable:

- Accession codes, unique identifiers, or web links for publicly available datasets
- A description of any restrictions on data availability
- For clinical datasets or third party data, please ensure that the statement adheres to our [policy](#)

The 10x Genomics sequencing data of genomes generated in this study have been deposited in the NCBI SRA database under accession code PRJNA943092 (<https://www.ncbi.nlm.nih.gov/sra/PRJNA943092>). All other relevant data are available from the corresponding author upon request. Source data are provided with this paper.

## Research involving human participants, their data, or biological material

Policy information about studies with [human participants or human data](#). See also policy information about [sex, gender \(identity/presentation\), and sexual orientation](#) and [race, ethnicity and racism](#).

|                                                                    |                                                     |
|--------------------------------------------------------------------|-----------------------------------------------------|
| Reporting on sex and gender                                        | No human participants were recruited in this study. |
| Reporting on race, ethnicity, or other socially relevant groupings | No human participants were included in this study.  |
| Population characteristics                                         | No human participants were recruited in this study. |
| Recruitment                                                        | No human participants were included in this study.  |
| Ethics oversight                                                   | No human participants were included in this study.  |

Note that full information on the approval of the study protocol must also be provided in the manuscript.

## Field-specific reporting

Please select the one below that is the best fit for your research. If you are not sure, read the appropriate sections before making your selection.

Life sciences  Behavioural & social sciences  Ecological, evolutionary & environmental sciences

For a reference copy of the document with all sections, see [nature.com/documents/nr-reporting-summary-flat.pdf](https://www.nature.com/documents/nr-reporting-summary-flat.pdf)

## Life sciences study design

All studies must disclose on these points even when the disclosure is negative.

|                 |                                                                                                                                                                                                                                                                                                                                                                                          |
|-----------------|------------------------------------------------------------------------------------------------------------------------------------------------------------------------------------------------------------------------------------------------------------------------------------------------------------------------------------------------------------------------------------------|
| Sample size     | No statistical analysis was performed to predetermine sample size. The sample sizes used in this study were determined based on the availability of sample.                                                                                                                                                                                                                              |
| Data exclusions | No data were excluded from the analyses.                                                                                                                                                                                                                                                                                                                                                 |
| Replication     | All of the experiments in this manuscript were replicated and for biochemical and relevant analysis were repeated in biological triplicates as described in the figure legends.                                                                                                                                                                                                          |
| Randomization   | The samples were not randomized in our study. This study was to confirm the genome integrity by whole genome sequencing, therefore it was impossible to rearrange samples randomly.                                                                                                                                                                                                      |
| Blinding        | Blinding was not used in our study. This study was to identify and characterize genome integrity by whole genome sequencing and cell-based approaches. The performance bias (blinding of participants) do not occur in our studies. But, the technical personnel who performed 10X Linked-read sequencing and optical genome mapping did not know the identity of samples, but the code. |

## Reporting for specific materials, systems and methods

We require information from authors about some types of materials, experimental systems and methods used in many studies. Here, indicate whether each material, system or method listed is relevant to your study. If you are not sure if a list item applies to your research, read the appropriate section before selecting a response.

### Materials & experimental systems

| n/a                                 | Involved in the study                                     |
|-------------------------------------|-----------------------------------------------------------|
| <input type="checkbox"/>            | <input checked="" type="checkbox"/> Antibodies            |
| <input type="checkbox"/>            | <input checked="" type="checkbox"/> Eukaryotic cell lines |
| <input checked="" type="checkbox"/> | <input type="checkbox"/> Palaeontology and archaeology    |
| <input checked="" type="checkbox"/> | <input type="checkbox"/> Animals and other organisms      |
| <input checked="" type="checkbox"/> | <input type="checkbox"/> Clinical data                    |
| <input checked="" type="checkbox"/> | <input type="checkbox"/> Dual use research of concern     |
| <input checked="" type="checkbox"/> | <input type="checkbox"/> Plants                           |

### Methods

| n/a                                 | Involved in the study                              |
|-------------------------------------|----------------------------------------------------|
| <input checked="" type="checkbox"/> | <input type="checkbox"/> ChIP-seq                  |
| <input type="checkbox"/>            | <input checked="" type="checkbox"/> Flow cytometry |
| <input checked="" type="checkbox"/> | <input type="checkbox"/> MRI-based neuroimaging    |

## Antibodies

|                 |                                                                                                                              |
|-----------------|------------------------------------------------------------------------------------------------------------------------------|
| Antibodies used | The antibodies used in this study:<br>HLA-ABC Monoclonal Antibody (W6/32), FITC, eBioscience, 11-9983-42, Lot 2132555, 1:200 |
|-----------------|------------------------------------------------------------------------------------------------------------------------------|

Mouse IgG2a kappa Isotype Control (eBM2a), FITC, eBioscience™, 11-4724-42, 1:200

Validation

HLA-ABC: <https://www.thermofisher.com/antibody/product/HLA-ABC-Antibody-clone-W6-32-Monoclonal/11-9983-42>  
 Mouse IgG2a kappa Isotype Control: <https://www.thermofisher.com/antibody/product/Mouse-IgG2a-kappa-clone-eBM2a-Isotype-Control/11-4724-42>

## Eukaryotic cell lines

Policy information about [cell lines and Sex and Gender in Research](#)

|                                                                   |                                                                                                                                                                                |
|-------------------------------------------------------------------|--------------------------------------------------------------------------------------------------------------------------------------------------------------------------------|
| Cell line source(s)                                               | H9 (NSC-H9, WiCell), NC01 (generated in our lab), iPSC-71 (material transfer from Joseph C. Wu, Stanford Cardiovascular Institute), ND40019*C (doi:10.1186/s13287-021-02585-2) |
| Authentication                                                    | Cell morphology, Immunofluorescence staining (SSEA4, Oct4, TRA-1-60, TRA-1-81)                                                                                                 |
| Mycoplasma contamination                                          | Cells used in this study are routinely screened using PCR. All tests for mycoplasma in the cells used in this study were negative.                                             |
| Commonly misidentified lines (See <a href="#">ICLAC</a> register) | No commonly misidentified cell line used in this study.                                                                                                                        |

## Flow Cytometry

### Plots

Confirm that:

- The axis labels state the marker and fluorochrome used (e.g. CD4-FITC).
- The axis scales are clearly visible. Include numbers along axes only for bottom left plot of group (a 'group' is an analysis of identical markers).
- All plots are contour plots with outliers or pseudocolor plots.
- A numerical value for number of cells or percentage (with statistics) is provided.

### Methodology

|                           |                                                                                                                                             |
|---------------------------|---------------------------------------------------------------------------------------------------------------------------------------------|
| Sample preparation        | Culture cells were dissociated with Accutase and prepared for FACS staining in PBS-2% FBS buffer                                            |
| Instrument                | Data were acquired with SONY SA3800 Spectral Cell analyzer.                                                                                 |
| Software                  | The data were analyzed with FlowJo 10.8.1.                                                                                                  |
| Cell population abundance | We did not perform flow cytometry sorting in this study.                                                                                    |
| Gating strategy           | The gating strategy are described in detailed in the Source Data file. The single cell gating strategy was used to exclude cell aggregates. |

- Tick this box to confirm that a figure exemplifying the gating strategy is provided in the Supplementary Information.
